## Games of risk and reward in carnivore communities

Joel Ruprecht<sup>a,1</sup>, Charlotte E. Eriksson<sup>a,2</sup>, Tavis D. Forrester<sup>b,2</sup>, Derek B. Spitz<sup>c</sup>, Darren A. Clark<sup>b</sup>, Michael J. Wisdom<sup>d</sup>, Marcus Bianco<sup>b</sup>, Mary M. Rowland<sup>d</sup>, Joshua B. Smith<sup>b</sup>, Bruce K. Johnson<sup>b</sup>, and Taal Levi<sup>a</sup>.

<sup>a</sup>Department of Fisheries and Wildlife, Oregon State University, <sup>b</sup>Oregon Department of Fish and Wildlife, <sup>c</sup>Environmental Studies Department, University of California, Santa Cruz, <sup>d</sup>USDA Forest Service Pacific Northwest Research Station

<sup>1</sup>To whom correspondence may be addressed.

<sup>2</sup>These authors contributed equally to this work.

**Email:** ruprechtjoel@gmail.com

**Author Contributions:** All authors designed the research and edited the manuscript. J.R. and T.L. led the writing. J.R., T.D.F., M.B., and J.B.S. collected data. C.E.E. conducted DNA metabarcoding for diet. J.R., T.L. and D.B.S. analyzed the data.

**Competing Interest Statement:** The authors declare no competing interest.

**Classification:** Biological Sciences, Ecology.

**Keywords:** Carnivore, facilitation, mesopredator release, scavenging, suppression.

### This PDF file includes:

Main Text  
Figures 1 to 6  
Tables 1 to 1

## 1 **Abstract**

2 Mesopredator release theory suggests that dominant predators suppress subordinate carnivores  
3 and ultimately shape community dynamics, but the assumption that subordinate species are only  
4 negatively affected ignores the possibility of facilitation through scavenging. We examined the  
5 interplay within a carnivore community consisting of cougars, coyotes, black bears, and bobcats  
6 using contemporaneous Global Positioning System telemetry data from 51 individuals, diet  
7 analysis from 972 DNA-metabarcoded scats, and data from 128 physical investigations of cougar  
8 kill sites, 28 of which were monitored with remote cameras. Resource provisioning from  
9 competitively-dominant cougars to coyotes through scavenging was so prolific as to be an  
10 overwhelming determinant of coyote behavior, space use, and resource acquisition. This was  
11 evident via strong attraction of coyotes to cougar kill sites, frequent scavenging of cougar-killed  
12 prey, and coyote diets that nearly matched cougars in the magnitude of ungulate consumption.  
13 Yet coyotes were often killed by cougars and used space to minimize encounters, complicating  
14 the fitness benefits gained from scavenging. We estimated that 23% (95% CI: 8–55%) of the  
15 coyote population in our study area was killed by cougars annually suggesting that coyote  
16 interactions with cougars are a complex behavioral game of risk and reward. In contrast, we  
17 found no indication that bobcat space use or diet was influenced by cougars. Black bears avoided  
18 cougars, but there was no evidence of attraction to cougar kill sites, and much lower levels of  
19 ungulate consumption and carcass visitation than for coyotes. Interspecific interactions among  
20 carnivores are multifaceted encompassing both suppression and facilitation.

## 21 **Significance Statement**

22 An incomplete understanding of the total influence competitively-dominant predators exert on  
23 subordinate species hinders our ability to anticipate the effects that changing carnivore  
24 populations will have in ecological communities. Here we show that cougars are the architects of  
25 a complex behavioral game of risk and reward, as subordinate or co-occurring carnivores are  
26 both provisioned and preyed on by the dominant predators. Each co-occurring carnivore species  
27 considered here employed a different strategy to approach the risk-reward tradeoff suggesting  
28 there are multiple viable solutions to the game. By not considering the multitude of effects  
29 dominant predators have on other carnivores, we are missing important linkages in terrestrial  
30 food webs.

31  
32

## 33 **Main Text**

### 34 **Introduction**

35  
36  
37 The mesopredator release hypothesis posits a trophic cascade wherein larger-bodied  
38 and competitively-dominant predators suppress subordinate predators with consequences for  
39 prey populations (1-4). Such suppression is often the result of interspecific killing that may be so  
40 pervasive as to account for one- to two-thirds of the total mortality of terrestrial carnivores (5-7).  
41 Subordinate species may respond to this risk by altering their space use or activity patterns to  
42 minimize the probability of encounters with dominant predators (8, 9), but nonetheless, the  
43 antagonism between predator species can result in reductions in density or complete exclusion of  
44 subordinate carnivores from certain habitats or regions (4, 10, 11).

45 The assumption that only negative interactions influence carnivore community structure is  
46 likely overly simplistic because scavenging of dominant predator kills can also provision  
47 subordinate species (7, 12, 13). While the prey killed by dominant predators may represent a  
48 'fatal attraction' that leads mesopredators to their death, the energetic rewards from scavenging  
49 in some cases may outweigh the risks (14). For example, if the risk of scavenging is the same as  
50 hunting alternative prey but yields a higher probability of finding food, the fitness-maximizing

51 decision for the subordinate or co-occurring species should be to scavenge (Fig. 1; *SI Appendix*,  
52 Text S1). But as risks associated with scavenging increase, the optimal choice becomes a more  
53 nuanced function of the relative risk versus reward and depends on the energetic state of the  
54 potential scavenger (Fig. 1a; *SI Appendix*, Text S1). And, of course, the scavenger must make  
55 this assessment under imperfect knowledge of the risk involved. Thus, the decision for a  
56 subordinate species to scavenge from a dominant species represents a complex behavioral  
57 game of risk and reward (Fig. 1b). How the costs and benefits of interactions with dominant  
58 predators influence the overall fitness of subordinate or co-occurring species has rarely been  
59 examined.

60 Understanding the intraguild dynamics of carnivores is critical to anticipating the  
61 ecosystem-level consequences of changing predator populations, but establishing the relative  
62 prevalence of suppression and facilitation among carnivores has remained intractable. Strong  
63 inference about the magnitude and direction of behavioral and population-level interactions  
64 among carnivores requires (1) quantifying the intraguild predation rate on subordinate or co-  
65 occurring carnivores, (2) understanding the extent to which subordinate or co-occurring  
66 carnivores utilize carrion from dominant predator kills, and (3) evaluating whether dominant  
67 predators or their kills influence the movements or space use of subordinate or co-occurring  
68 carnivores. Spatial avoidance of dominant predators and high rates of intraguild predation would  
69 suggest other carnivores are suppressed. By contrast, high utilization of dominant predator kills  
70 by subordinates would support the facilitation hypothesis. We note that while the literature often  
71 refers to the benefit conferred by scavenging as facilitation (7, 12, 14), this term implies no harm  
72 to the dominant species. If carrion is lost due to scavenging while the owner of the kill is still  
73 utilizing the carcass (15, 16), the phenomenon may be more appropriately termed parasitism, or  
74 more specifically, kleptoparasitism.

75 Here we quantify the influence of cougars (*Puma concolor*) on coyotes (*Canis latrans*),  
76 black bears (*Ursus americanus*), and bobcats (*Lynx rufus*). Cougars are widely considered  
77 dominant to coyotes and bobcats, and although previous researchers have suggested cougars  
78 are subordinate to black bears, the available literature suggests that cougars kill bears more often  
79 than the reverse (17). We therefore consider bears and cougars to be co-occurring and not  
80 necessarily fitting within a clear dominance hierarchy. We leveraged four empirical datasets  
81 including contemporaneous Global Positioning System (GPS) telemetry data of 51 individuals  
82 across the four species of carnivores, diet analysis from 972 DNA-metabarcoded carnivore scats,  
83 and data from 128 physical investigations of cougar kill sites, 28 of which were monitored for  
84 scavenging via remote cameras to evaluate how sympatric carnivores are influenced by cougars.  
85 We hypothesized that black bears, bobcats and coyotes could be unaffected by cougars (null  
86 hypothesis), negatively influenced by cougars (suppression hypothesis), positively influenced by  
87 cougars (facilitation hypothesis), or both positively and negatively affected by cougars (“provision-  
88 predation hypothesis” if the positive and negative interactions are independent, “fatal attraction  
89 hypothesis” if scavenging leads to increased mortality) (Fig. 1c). We used contemporaneous GPS  
90 data to infer whether each carnivore species altered movements due to the proximity of a cougar  
91 or cougar kill site. We hypothesized that carnivore species attracted to cougar kill sites would  
92 have a high frequency of carrion in their diet—suggesting facilitation from cougars—but would  
93 also be killed by cougars at higher rates than species that avoided cougar kill sites, indicating  
94 suppression. Together, these approaches provided a robust evaluation of the fine-scale  
95 behavioral interactions and facilitation versus suppression tradeoff among species within  
96 carnivore communities, which will be increasingly important as predator populations recover  
97 across portions of their former range and are extirpated in others.

## 98 99 **Materials and Methods**

100  
101 **Data collection.** We collected data on four sympatric carnivore species (cougars, coyotes, black  
102 bears, and bobcats) in and adjacent to the Starkey Experimental Forest and Range in the Blue  
103 Mountains of northeastern Oregon, USA (Fig. 2 and *SI Appendix*, Text S2) between 2016 and  
104 2020. We tagged 17 cougars (8M, 9F), 17 coyotes (10M, 7F), 11 black bears (7M, 4F), and 6  
105 bobcats (3M, 3F) with GPS collars (Vectronic Aerospace or Lotek Wireless, Inc.) programmed to

106 record positions every 2 or 3 hours (*SI Appendix*, Text S3). We used conservation detection dogs  
107 (18) to locate scats (*SI Appendix*, Text S4) and genetically confirmed 774 coyote scats, 85 black  
108 bear scats, 96 bobcat scats, and 17 cougar scats (19) that were DNA-metabarcoded for diet  
109 analysis (*SI Appendix*, Text S5). We considered the frequency of occurrence of elk [*Cervus*  
110 *canadensis*] in scats of subordinate carnivores as a qualitative but imperfect proxy for  
111 scavenging (14). It is unlikely any of the subordinate carnivores could kill adult elk so any elk  
112 found in scats must be from scavenging or direct predation on calves. However, elk consumption  
113 by coyotes and bobcats is likely exclusively from scavenging because these species rarely kill elk  
114 calves in the region (20). Nonetheless, the frequency of occurrence of elk in scats, particularly for  
115 bears, can only be interpreted as the maximum possibly attained from scavenging because some  
116 unknown fraction may have come from predation of neonates. In addition to inference from scat  
117 analysis, we further quantified cougar diets by conducting ground searches of clusters of cougar  
118 GPS locations indicating potential kill sites of tagged individuals (*SI Appendix*, Text S6) (21). At  
119 28 of the 128 confirmed cougar kill sites, we deployed remote cameras (Bushnell Trophy Cam  
120 Aggressor, Browning Dark Ops HD Pro, and Reconyx HyperFire 2) to estimate scavenging rates  
121 by the other carnivores. We separately tallied the number of daily visits made by coyotes, bears  
122 and bobcats to cougar kill sites that were detected on camera, where a visit was defined as a  
123 detection separated by at least 30 minutes from another detection of a given species. We used  
124 negative binomial regression to model the number of daily visits to the carcass by a given species  
125 as:

126  
127  $number\ of\ daily\ visits = cougar\ present + \ln(time\ since\ kill) + prey\ size + kill\ ID$   
128

129 where cougar present (1/0) indicates whether the cougar was present at the kill that day, time  
130 since kill is the number of days since the kill was made, prey size (1/0) indicates whether the prey  
131 was large (adult ungulate) or not (young of the year ungulate), and kill ID is a random intercept  
132 identifying a given kill site.  
133

134 **Calculating Intraguild Predation Rate.** At times, the prey items found at cougar kill sites were  
135 other carnivores which allowed us to calculate the proportion of cougar kills representing  
136 intraguild predation. Combining these data with information on contemporaneously-estimated  
137 carnivore densities (22) and cougar kill rates (21) from a recent study in the area allowed us to  
138 calculate intraguild predation rates, i.e., the proportion of the co-occurring carnivore population  
139 dying annually due to cougar predation. We calculated the intraguild predation rate on species  $i$   
140 ( $P_i$ ) as the number of individuals from species  $i$  killed per unit time ( $K_i$ ) divided by the population  
141 density of species  $i$  ( $D_i$ ) where  $K_i$  is the product of cougar population density ( $D_c$ ) cougar kill rate  
142 (kills/year),  $R$ , and proportion of kills corresponding to species  $i$  ( $F_i$ ):  
143

144 
$$P_i = \frac{K_i}{D_i} = \frac{D_c \times R \times F_i}{D_i}$$

145  
146 We quantified uncertainty in  $P_i$  by propagating error inherent in each parameter using Markov  
147 Chain Monte Carlo simulations (*SI Appendix*, Text S7).  
148

149 **Step selection functions.** We fit integrated step-selection functions (hereafter *SSFs*) (23, 24) to  
150 GPS collar data to estimate how coyote, bobcat, and bear movements were influenced by  
151 landscape variables, cougar proximity, or cougar kill site proximity. We included movement  
152 attributes as parameters in each model to reduce bias arising from sampling control locations (25)  
153 using a gamma distribution to characterize the natural log of step lengths and a von Mises  
154 distribution to characterize the cosine of turning angles (24, 26). We generated 20 random steps  
155 for each observed step (27). To ensure that territoriality did not bias inference, we did not allow  
156 the endpoints of random steps to fall outside a 1,000 m buffer of the 99% minimum convex  
157 polygon of each animal's territory. We did this to prevent detecting spurious avoidance behavior

158 due to a random step occurring in an area for which the animal did not have uninhibited access  
159 due to territoriality.

160 We sought to identify whether landscape features and the proximity of a cougar  
161 (hereafter, 'distance to cougar' or D2C) or cougar kill site (hereafter, 'distance to kill' or D2K)  
162 influenced the movements of coyotes, bobcats, and bears. We calculated distance to cougar as  
163 the natural log-transformed Euclidean distance between each focal individual (coyote, bobcat, or  
164 bear) and the nearest GPS-collared cougar at that time to determine whether the subsequent  
165 movements of the animal were toward or away from the cougar. To restrict encounters to only  
166 those in which the cougar could plausibly be detected by the subordinate species, we only  
167 allowed cougars within 1,000 m of the focal bear, bobcat, or coyote to influence the movements  
168 of the other carnivores by using a binary indicator for whether a cougar was present (hereafter,  
169 'cougar present' or CP) (1/0) at each GPS fix. We cast 'distance to cougar' as an interaction term  
170 with 'cougar present' such that the term was nullified when the nearest known cougar was >  
171 1,000 m away. We used a buffer of 1,000 m because that is the distance elk alter behavior in  
172 response to wolves (*Canis lupus*) (28) and has also been used to determine interaction distances  
173 between cheetahs (29). Further, it is implausible that species could detect cougars at distances  
174 greatly exceeding this value. However, to ensure this cutoff did not change our inference about  
175 the direction or magnitude of the effect of cougars, we replicated the analyses using additional  
176 cutoff values of 500 and 1,500 m. If GPS fixes between cougars and the other carnivores were  
177 not contemporaneous (i.e. falling on the same hour plus a tolerance of 300 seconds) due to  
178 misalignment or missed fixes, we imputed the location of the cougar using a correlated random  
179 walk (30). We allowed cougar locations to be imputed if a single GPS fix was missed but we  
180 censored location data for any gaps exceeding 6 hours.

181 We used this same approach to assess how carnivores responded to cougar kill sites by  
182 including a term for 'distance to kill,' calculated as the natural log of the Euclidean distance  
183 between each GPS position of a focal individual and the nearest cougar kill site. Potential kill sites  
184 were identified from clusters of sequential cougar GPS locations indicating reduced movement  
185 and were either confirmed via physical investigations or identified as probable kills using a  
186 predictive model (21) (*SI Appendix*, Text S6). We paired 'distance to kill' with a binary indicator  
187 variable describing whether there was a known or predicted cougar kill present (hereafter, 'kill  
188 present' or KP) (1/0) within a 3,000 m buffer of the focal individual. When there was not a kill  
189 within the buffer, the indicator variable took the value of zero and the whole term became null. If  
190 there was more than one kill within this buffer for a given individual at a given time, we considered  
191 only the distance to the most recent kill. Our assumption that carnivores could detect a carcass  
192 up to distances of 3,000 m was conservative; for example, one GPS-collared coyote in our study  
193 exhibited two bouts of directed travel of 2.2 km and 3.6 km outside its territory to feed on an elk  
194 carcass suggesting an ability to detect carrion from these distances (*SI Appendix*, Fig. S1).  
195 Further, previous studies report that coyotes can travel between 12.2 and 20.5 km to reach  
196 carcasses of domestic animals (31, 32), while arctic foxes (*Vulpes lagopus*) routinely detect  
197 marine mammal carcasses at distances of at least 10 km (33). While less is known about  
198 olfaction distances in bears, it is reported that polar bears (*Ursus maritimus*) can detect seal  
199 breathing holes at distances of 3 km (34). While the available literature suggests 3,000 m is an  
200 appropriate value for a cutoff, we replicated each analysis using cutoffs of 2,000 m and 4,000 m  
201 to ensure inference was not an artifact of the buffer chosen.

202 To avoid data contamination due to old carcasses that no longer provided scavenging  
203 opportunities, we classified all kills occurring within 30 days of the focal fix as present by  
204 censoring kills exceeding this threshold. To quantify how movements of carnivores toward or  
205 away from the kill may change as the carcass aged, we created another variable cast as an  
206 interaction between the kill present indicator variable (KP), the natural log of the distance to kill  
207 (D2K), and the natural log of the time elapsed since the kill (hereafter, 'time since kill' or TSK).  
208 This interaction allowed the magnitude of avoidance or attraction to change as a function of the  
209 age of the carcass.

210 It is certain that at times additional cougars were present in the study area not monitored  
211 with GPS collars, so the inferences made about effects of cougars and their kill sites on the other  
212 carnivore species should be considered conservative, at least if the collared sample was

213 representative of the entire population. Thus, with complete information on all cougar and kill site  
214 locations, the D2C and D2K variables may have had larger effect sizes and/or smaller standard  
215 errors than reported here, assuming carnivores exhibited similar behavior toward collared and  
216 uncollared cougars.

217 Before including cougar variables, we first fit models containing only landscape, and  
218 movement variable (hereafter, *habitat model*) according to

$$219 w(x) = \exp(\beta \times \text{landscape variables} + \beta_{\text{turn angle}} \times \cos(\text{turn angle}) + \beta_{\text{step length}} \times \ln(\text{step length}))$$

220  
221 where 'landscape variables' refer to the continuous variables  $\ln(\text{distance to open road})$ ,  
222  $\ln(\text{distance to perennial water source})$ , canopy cover, topographic ruggedness, and the factor  
223 variable potential vegetation type. *A priori*, we expected each of these landscape variables to  
224 influence resource selection of each of the species considered, so for simplicity we did not  
225 conduct model selection on subsets of these variables and instead retained them all.

226  
227 We then added the cougar and kill site terms and used Akaike's Information Criterion  
228 (AIC) (35) to assess whether this full model (hereafter, *habitat + cougar model*) outperformed the  
229 habitat-only model:

$$230  
231 w(x) = \exp(\beta \times \text{landscape variables} + \beta_{D2C} \times CP \times D2C + \beta_{D2K} \times KP \times D2K +  
232 \beta_{D2K \times TSK} \times KP \times D2K \times TSK + \beta_{\text{turn angle}} \times \cos(\text{turn angle}) + \beta_{\text{step length}} \times \ln(\text{step length}))$$

233  
234 By setting  $\beta_{D2K} \times KP \times D2K + \beta_{D2K \times TSK} \times KP \times D2K \times TSK$  equal to zero and solving for  
235 TSK, we estimated the time until the effect of the kill becomes null. Assuming a kill site is initially  
236 a source of attraction that diminishes in time, this is estimated by

$$237  
238 \exp\left(-\frac{\beta_{D2K}}{\beta_{D2K \times TSK}}\right)$$

239  
240 We used the 'amt' package (26) in Program R 3.6.1 (R Development Core Team 2019) to  
241 format data, generate random steps, and fit models.

242  
**Evaluating Weight of Evidence for Facilitation, Suppression, and Null Hypotheses.** We  
243 define suppression as the outcome of negative interactions, possibly including death or simply  
244 instilling fear to a degree that motivates changes in behavior or habitat use (36). Correspondingly,  
245 we define facilitation as the outcome of beneficial or positive interactions, including increased  
246 foraging opportunities that may improve fitness, and may motivate changes in behavior or habitat  
247 use. We leveraged multiple independent datasets on the four carnivore species using a weight of  
248 evidence approach to determine whether cougars suppress and/or facilitate black bears, bobcats,  
249 and coyotes. *A priori*, we established the following criteria: 1) spatial avoidance of cougars would  
250 be evidence of suppression, attraction to cougars would be evidence of facilitation, and  
251 indifference toward cougars would support the null hypothesis, 2) spatial avoidance of cougar kill  
252 sites would be evidence of suppression, attraction to kill sites would be evidence of facilitation,  
253 and indifference toward kill sites would support the null hypothesis, 3) a higher frequency of  
254 ungulates found in scats of subordinate or co-occurring predators (a proxy for scavenging in our  
255 system) in similar proportions to those observed in cougar scats would suggest a higher degree  
256 of facilitation than would a lower frequency of ungulates found in scats, and no ungulates found in  
257 scats would support the null hypothesis, 4) higher scavenging rates would suggest a greater  
258 degree of facilitation than would lower scavenging rates, and the absence of scavenging would  
259 support the null hypothesis, and 5) any amount of intraguild predation by cougars on other  
260 carnivores would be evidence of suppression (regardless of whether the mortality is  
261

262 compensatory), whereas complete absence of intraguild predation would support the null  
263 hypothesis.

264

## 265 Results

266

267 **Step selection functions.** Coyotes, black bears, and bobcats each responded to a subset of  
268 landscape variables; most notably, bears and bobcats strongly selected for high canopy cover while  
269 coyotes avoided high canopy cover (Table 1 and *SI Appendix*; Fig. S2). Including the three cougar  
270 parameters (CP × D2C, KP × D2K, and KP × D2K × TSK) substantially improved model fit for bears  
271 ( $\Delta\text{AIC} = 10.36$ ) and particularly for coyotes ( $\Delta\text{AIC} = 23.96$ ), but the habitat-only model outperformed  
272 the habitat + cougar model for bobcats ( $\Delta\text{AIC} = 2.69$ ) (*SI Appendix*, Table S1). Notably, coyotes  
273 exhibited a strong attraction to cougar kill sites ( $\beta = -0.26$ ,  $p < 0.001$ ) which attenuated as the  
274 carcass aged ( $\beta = 0.071$ ,  $p < 0.001$ ; Fig. 3 and Table 1) and resulted in approximately 39 days of  
275 selection for cougar kill sites. Post-hoc analyses revealed that attraction of coyotes to cougar kill  
276 sites was driven primarily by resident male coyotes (*SI Appendix*, Text S9–S10, Table S2–S3).  
277 Coyotes avoided cougars ( $\beta = 0.20$ ,  $p = 0.014$ ; Table 1), but there was no evidence to suggest  
278 attraction to kill sites was diminished if a cougar was present at the kill, indicating coyotes may  
279 disregard the risk of cougars when a food reward is present (*SI Appendix*, Text S11, Table S4).  
280 Bears were indifferent to kill sites ( $\beta = 0.01$ ,  $p = 0.93$ ) but actively avoided cougars ( $\beta = 0.55$ ,  $p \leq$   
281  $0.001$ ; Table 1). Bobcats were indifferent to both cougars ( $\beta = 0.26$ ,  $p = 0.33$ ) and their kill sites ( $\beta$   
282  $= 0.11$ ,  $p = 0.54$ ; Table 1). A post-hoc analysis did not provide strong evidence that bobcats avoided  
283 coyotes in space and therefore coyote presence was probably not the primary reason they did not  
284 utilize cougar kills (*SI Appendix*, Text S12, Table S5). For all species, the choice of buffer for  
285 determining whether a cougar (CP) or kill (KP) was present did not appreciably change inference  
286 about the direction or magnitude of these effects except that coyote avoidance of cougars was only  
287 evident when buffers 1,000 m or less were used (*SI Appendix*, Text S13, Table S6–S11).

288

289 **Diet analysis.** DNA metabarcoding of carnivore scats revealed a variable frequency of occurrence  
290 of deer and elk across species. In coyotes, elk and deer were present in 58% and 12% of scats,  
291 respectively (Fig. 4b). In bears, elk was found in 29% of scats and deer in 8% of scats (Fig. 4b).  
292 Zero bobcat scats contained elk and 8% contained deer (Fig. 4b). For cougars, 61% of scats  
293 contained elk and 22% contained deer. Investigations of 128 cougar kill sites with confirmed prey  
294 revealed that elk represented 64% and deer 16% of the prey items killed by cougars (Figs. 4a, 4b).

295

296 **Scavenging Rates.** We monitored 28 cougar kill sites containing ungulate prey using remote  
297 cameras to estimate scavenging rates. Cameras were placed an average of 4.4 days after the kill  
298 was made (range: 0–16 days; 5 cameras deployed within one day of the kill) and were operational  
299 an average of 17.4 (range: 1–52) days. We documented coyotes present at 89% of carcasses,  
300 bears at 50% of the carcasses outside the hibernation period ( $N = 22$ ), and zero bobcats were  
301 detected at cougar kills (Fig. 4c, 4d) during the period cameras were active. For coyotes, the  
302 negative binomial regression model predicted that one day after a large ungulate was killed, the  
303 carcass would receive 1.8 visits by coyotes but that the number of visits would be reduced by 27%  
304 with every additional  $\ln(\text{day})$  ( $\beta = -0.31$ ,  $p = 0.067$ ; Fig. 5a). The coyote visitation rate was expected  
305 to be 160% higher for a large ungulate than a juvenile ungulate ( $\beta = 0.97$ ,  $p = 0.059$ ) and was not  
306 influenced by cougar presence ( $\beta = 0.43$ ,  $p = 0.26$ ). The bear model predicted 0.36 visits by bears  
307 the day after a large ungulate was killed and that every additional  $\ln(\text{day})$  would reduce the number  
308 of visits by 52% ( $\beta = -0.73$ ,  $p = 0.051$ ; Fig. 5b). The number of daily bear visits was not influenced  
309 by the size of prey ( $\beta = 0.39$ ,  $p = 0.50$ ) nor whether a cougar was present ( $\beta = -0.12$ ,  $p = 0.89$ ).  
310 The intercepts were  $-0.81$  ( $p = 0.22$ ) and  $-1.32$  ( $p = 0.29$ ) for the coyote and bear models,  
311 respectively.

312

313 **Intraguild Predation.** Physical investigations of cougar kill sites indicated that coyotes represented  
314 7.0% (9 of 128; 95% CI: 3.3–11.1%) of cougar kills (Fig. 4e, f). In eight cases coyotes were the only  
315 prey item found and were consumed by cougars, and in one case a dead coyote was found in  
316 conjunction with another prey item. One transient GPS-collared coyote in our sample was killed

317 and consumed by an uncollared cougar outside the study area (Fig. 4e) and in another instance, a  
318 GPS-collared cougar killed and consumed a GPS-collared coyote. By observing dead coyotes at  
319 7% of cougar kill sites, and given a cougar density of 2.2 per 100 km<sup>2</sup> in our study area (22), this  
320 suggests that approximately 8.4 coyotes are killed per 100 km<sup>2</sup> per year. With a coyote density of  
321 33.9 per 100 km<sup>2</sup> (22), this level of mortality reflects 23.0% (95% CI: 8.4–54.5% when all sources  
322 of uncertainty are propagated) of coyotes killed by cougars annually:  
323

$$324 \text{ Intraguild Predation rate} = \frac{(2.2 \text{ cougars} \cdot 100 \text{ km}^2) \times (54.5 \text{ kills} \cdot \text{cougar}^{-1} \cdot \text{year}^{-1}) \times (0.07 \text{ dead coyotes} \cdot \text{kill}^{-1})}{33.9 \text{ coyotes} \cdot 100 \text{ km}^2}$$

325  
326 **Weight of Evidence for Facilitation, Suppression, and Null Hypotheses.** We found evidence  
327 of both facilitation and suppression of other carnivore species by cougars (Fig. 6). Most notably,  
328 coyotes exhibited facilitation in three of the five measures evaluated (statistically significant  
329 attraction to kill sites, frequent carrion in diet, and high scavenging rates) and indication of  
330 suppression in two measures (the presence of intraguild predation and avoidance of cougars).  
331 Bears showed evidence of facilitation in two measures (moderate scavenging rates and moderate  
332 levels of carrion in diet), suppression in one measure (statistically significant avoidance of cougars),  
333 and no evidence in two measures (absence of statistically significant attraction or avoidance of kill  
334 sites, absence of intraguild predation). We found no evidence that cougars influenced bobcats in  
335 any of the five measures we evaluated, fully supporting the null hypothesis that cougars neither  
336 suppress nor facilitate bobcats.

## 337 338 Discussion

339  
340 The traditional paradigm concerning species interactions among carnivores has stressed  
341 the existence of dominance hierarchies such that dominant predators suppress mesopredators  
342 with consequences for their shared prey (1). However, recent work has emphasized the  
343 importance of carrion subsidies from dominant to subordinate carnivores. Given the potential for  
344 both top-down and bottom-up forcing within the carnivore guild, the generality of whether  
345 subordinate species incur a net fitness cost or benefit from dominant predators is far from  
346 resolved (7, 12, 14, 37). A particularly missing component has been quantifying both scavenging  
347 rate and intraguild predation rate within a given carnivore guild, which a recent meta-analysis  
348 found absent from all 256 reviewed studies (7). We assessed the relative strength of suppressive  
349 and facilitative forces between a competitively-dominant predator and three subordinate or co-  
350 occurring predators by (i) using contemporaneous GPS-tracking of four carnivore species  
351 spanning the dominance hierarchy to quantify behavioral avoidance of the dominant species and  
352 attraction to its kills, (ii) conducting diet analysis with DNA metabarcoding to quantify potential use  
353 of provisioned carrion by subordinate carnivores, (iii) quantifying the visitation rate of subordinate  
354 carnivores to the kills of the dominant carnivore, and (iv) by quantifying the strength of top-down  
355 interactions measured as the predation rate of dominant carnivores on subordinate species.

356 Our strongest evidence of facilitation suggested that resource provisioning from cougars  
357 to coyotes through scavenging was so ubiquitous as to be an overwhelming determinant of  
358 coyote behavior, space use, and resource acquisition. This finding was demonstrated through  
359 strong attraction of coyotes to cougar kill sites, coyotes scavenging nearly all carcasses that we  
360 monitored, and coyote diets that nearly matched cougars in the magnitude and composition of  
361 ungulate consumption. While this clearly suggests that scavenging confers a reward to coyotes,  
362 coyotes actively avoided cougars in space, and our estimation that 23% of the coyote population  
363 was killed annually by cougars implies that there also exists a strong suppressive effect  
364 counteracting the fitness benefit provided by the dominant predator. However, it is not clear that  
365 coyotes incurred this predation risk by scavenging given that only 1 of the 9 coyote mortalities  
366 caused by cougars occurred in the proximity of a kill site. Nonetheless, this is still suggestive of  
367 increased risk while scavenging because coyotes likely spend substantially less than 1/9 of their  
368 daily activity budget (2.67 hours daily) at cougar kills. But small sample size precludes statistical



369 determination of how much, or if, predation risk per unit time is higher while actively scavenging,  
370 which is needed to determine whether the fatal attraction hypothesis is supported in this system.  
371 If risk from dominant predators is not higher at kill sites than elsewhere on the landscape, then  
372 scavenging becomes an even more appealing prospect (Fig. 1a). While previous research has  
373 found substantial coyote mortality while scavenging at both cougar (21, 38, 39) and wolf kill sites  
374 (40), coyotes can also mitigate risk by exhibiting heightened vigilance while scavenging (41) as  
375 has also been reported for marten (*Martes martes*) and red fox (*Vulpes vulpes*) at wolf kill sites  
376 (42). Two lines of evidence suggest coyotes do not reduce their use of kill sites if cougars are  
377 present at the kill; terms accounting for this were not significant in either the regression model of  
378 kill site visits from camera data nor a post-hoc step-selection function with an added term  
379 indicating whether a cougar was on a kill in question (*SI Appendix*, Text S11, Table S4). This  
380 suggests that coyotes readily accept the risk of being near a cougar if a food reward is available,  
381 possibly because they can manage the increased risk through vigilance. In addition, if dominant  
382 predators become satiated after feeding on a kill, they may have little motivation to kill other  
383 carnivores if their primary reason for doing so is to consume them. Determining whether dominant  
384 carnivores kill subordinate carnivores for an immediate energetic gain (intraguild predation) or for  
385 the long-term benefit of removing a competitor (interference competition) should be the focus of  
386 further study.

387 Theory suggests that different species of carcass competitors should have unique risk-  
388 reward calculations even for the same scavenging opportunities (Fig. 1a) and this was clearly true  
389 in our system. Not only did GPS tracking indicate no attraction of bears toward cougar kills, scat  
390 analysis revealed elk constituted only a moderate percentage of the diets of black bears.  
391 Because bears prey on elk neonates (40), an unknown fraction of the elk in their diet may have  
392 come from direct predation and not scavenging, leading to an even greater disparity in the  
393 amount of carrion consumed between bears and coyotes. A lower rate of bear scavenging at  
394 cougar kills is further supported by camera data indicating that bears were less frequent visitors  
395 to cougar kills than were coyotes. The lack of attraction to kill sites as measured by GPS data  
396 suggests that the bears that did visit cougar-killed prey may have encountered them  
397 opportunistically as suggested by previous research (39), in contrast to coyotes which at times  
398 made long and directed movements toward kill sites (Fig. S1). While bears neither selected for  
399 nor avoided cougar kills, step-selection functions indicated that black bears did actively avoid  
400 cougars and this was true for both male and female bears (*SI Appendix*, Text S14, Table S12).  
401 This was unexpected because bears are capable of usurping prey from wolves (43), cougars  
402 (44), and Eurasian lynx (*Lynx lynx*) (45). However, cougars do kill bears in our study region (21,  
403 37) and literature from other systems reports more instances of cougars killing black bears than  
404 the reverse (17). Thus, our results suggesting that black bears viewed cougars as sufficiently  
405 threatening such that they made movements to minimize risk of confrontation is defensible. In  
406 contrast to coyotes and bears, we found no evidence to suggest that bobcats were in any way  
407 influenced by cougars. Their GPS tracks showed no response to cougar presence or kill sites,  
408 they never visited a cougar kill monitored by camera, their scats did not contain elk, and they  
409 were never found as a prey item at investigations of cougar kill sites. This was surprising given  
410 that bobcats scavenge from (15, 39) and fall prey to cougars (38, 46) in other systems, and  
411 because empirical evidence suggests that intraguild killing is more likely to occur within  
412 taxonomic families (6). By foregoing energetically-profitable cougar kills, and in doing so reducing  
413 mortality risk, bobcats in this system are approaching the risk and reward tradeoff quite  
414 differently.

415 So why do subordinate carnivores exhibit such wide variation in behavior toward  
416 dominant predators? As illustrated by our dynamic state variable model (Fig. 1a), there are  
417 multiple viable solutions to the game of risk and reward. Scavenging only optimizes fitness under  
418 a specific set of conditions that depends not only on risk and reward associated with scavenging,  
419 but also the probability of finding alternative food sources, the energy required to search for other  
420 food, and the current energetic state of the animal. For example, felids expend less energy  
421 hunting than do canids (47). If there are ample alternative prey available to bobcats in our system

422 and a low cost of pursuing them, the optimality of eschewing scavenging becomes even more  
423 apparent. And of course an animal near starvation should accept more risk to feed on an  
424 available carcass than would an animal in prime condition (Fig. 1a), though we lacked the data to  
425 assess this. Heightened risk tolerance may also be a function of the timing within an annual cycle.  
426 For example, more risk may be accepted to scavenge if increased body condition is needed  
427 seasonally to provision young such as is the case for cooperatively breeding canids (e.g. coyotes  
428 in Yellowstone National Park had larger litters and higher pup survival by scavenging intensively  
429 on elk (40)). Similarly, bears may scavenge more during periods of hyperphagia before  
430 hibernation (48). A pattern emerging from other systems is that risk from other scavengers—and  
431 not just the owner of the kill—influences the calculus of scavenging given the dominance  
432 hierarchy among the carcass competitors. For instance, jackals (*Canis mesomelas* and *Canis*  
433 *aureus*) rarely visit carcasses when there is risk from socially-dominant hyenas (*Crocuta crocuta*)  
434 at cheetah (*Acinonyx jubatus*) kills in the Serengeti (49), and hyenas rarely scavenge if male lions  
435 (*Panthera leo*) are present (50). Thus, the abstention of bobcats to scavenge in our system may  
436 also be due to their position in the dominance hierarchy of carcass competitors since they risk  
437 predation from both cougars and numerically-advantaged coyotes, although a post-hoc analysis  
438 did not provide support that bobcat made movements to avoid coyotes (*SI Appendix*, Text S12,  
439 Table S5). Coyotes in our system faced little risk except from cougars and scavenged profusely;  
440 however, recent evidence suggests that their propensity to scavenge is lower in systems where  
441 they are subordinate to multiple carcass competitors (37).

442 The complex interactions among carnivores within a given dominance hierarchy have  
443 both direct and indirect effects on species occupying lower trophic levels. There is mounting  
444 evidence that scavenging can cause dominant predators to increase their kill rate or modify prey  
445 selection. Increased kill rates due to kleptoparasitism have been observed across a wide range of  
446 taxa globally, including between eagles (*Haliaeetus leucocephalus*) and falcons (*Falco*  
447 *peregrinus*) in Canada (51), brown bears (*Ursus arctos*) and lynx in central and southeastern  
448 Europe (45), and black bears and cougars in North America (15, 16, 44). While we cannot directly  
449 assess whether scavenging in our system influenced cougar kill rate, the fact that coyotes  
450 routinely scavenged before kill site abandonment by cougars suggests that increased kill rates  
451 would be necessary to recover lost biomass (44). In addition to increasing predation rates, there  
452 is speculation that scavenging causes predators to select smaller-bodied prey to maximize  
453 energetic intake between hunting, feeding, and loss from scavengers, which in turn has  
454 evolutionary consequences for carnivore body size (52). Thus, interactions between carnivores  
455 can influence prey in complex and indirect ways.

456 To conclude, it is probably a gross oversimplification to propose that species interactions within  
457 terrestrial carnivore communities have either strictly positive, negative, or even neutral  
458 consequences (7). We demonstrated that coyotes, and to a lesser extent bears, were confronted  
459 by the opposing effects of both facilitation (through food provisioning) and suppression (through  
460 death), yet bobcats were seemingly unaffected by the dominant predator. Scavenging carrion  
461 from dominant predators incurs both risk and reward, and thus the willingness to engage in this  
462 activity should be mediated by behavioral optimization under natural selection. A frontier in  
463 carnivore community ecology requires disentangling the net fitness effects of scavenging by  
464 subordinate predators. This will be a challenge because mortality itself is an insufficient  
465 observation by which to conclude that scavenging incurs a fitness reduction given that it can be  
466 optimal to risk death by scavenging (Fig. 1a). Thus, scavenging behavior should be context  
467 dependent within and among species given the multiple viable strategies to solve this complex  
468 behavioral game subject to the risk and reward tradeoffs unique to each system.

469  
470  
471

## Acknowledgments

472 We are grateful to the Oregon Department of Fish and Wildlife, the USDA Forest Service Pacific  
473 Northwest Research Station, Oregon State University, and the Wildlife Restoration Act for funding

474 and/or logistical support. We thank a multitude of technicians and volunteers who assisted with  
475 fieldwork and photo tagging.

476

477

## 478 **References**

- 479 1. K. R. Crooks, M. E. Soulé, Mesopredator release and avifaunal extinctions in a  
480 fragmented system. *Nature* **400**, 563-566 (1999).
- 481 2. S. E. Henke, F. C. Bryant, Effects of coyote removal on the faunal community in western  
482 Texas. *The Journal of Wildlife Management*, 1066-1081 (1999).
- 483 3. L. R. Prugh *et al.*, The rise of the mesopredator. *Bioscience* **59**, 779-791 (2009).
- 484 4. T. Levi, C. C. Wilmers, Wolves–coyotes–foxes: a cascade among carnivores. *Ecology*  
485 **93**, 921-929 (2012).
- 486 5. F. Palomares, T. M. Caro, Interspecific killing among mammalian carnivores. *The*  
487 *American Naturalist* **153**, 492-508 (1999).
- 488 6. E. Donadio, S. W. Buskirk, Diet, morphology, and interspecific killing in Carnivora. *The*  
489 *American Naturalist* **167**, 524-536 (2006).
- 490 7. L. R. Prugh, K. J. Sivy, Enemies with benefits: integrating positive and negative  
491 interactions among terrestrial carnivores. *Ecology Letters* **23**, 902-918 (2020).
- 492 8. S. M. Durant, Living with the enemy: avoidance of hyenas and lions by cheetahs in the  
493 Serengeti. *Behavioral Ecology* **11**, 624-632 (2000).
- 494 9. E. Dröge, S. Creel, M. S. Becker, J. M'soka, Spatial and temporal avoidance of risk within  
495 a large carnivore guild. *Ecology and Evolution* **7**, 189-199 (2017).
- 496 10. D. J. Harrison, J. A. Bissonette, J. A. Sherburne, Spatial relationships between coyotes  
497 and red foxes in eastern Maine. *The Journal of Wildlife Management*, 181-185 (1989).
- 498 11. J. D. Linnell, O. Strand, Interference interactions, co-existence and conservation of  
499 mammalian carnivores. *Diversity and Distributions* **6**, 169-176 (2000).
- 500 12. K. J. Sivy, C. B. Pozzanghera, K. E. Colson, M. A. Mumma, L. R. Prugh, Apex predators  
501 and the facilitation of resource partitioning among mesopredators. *Oikos* **127**, 607-621  
502 (2018).
- 503 13. C. C. Wilmers, R. L. Crabtree, D. W. Smith, K. M. Murphy, W. M. Getz, Trophic facilitation  
504 by introduced top predators: grey wolf subsidies to scavengers in Yellowstone National  
505 Park. *Journal of Animal Ecology* **72**, 909-916 (2003).
- 506 14. K. J. Sivy, C. B. Pozzanghera, J. B. Grace, L. R. Prugh, Fatal attraction? Intraguild  
507 facilitation and suppression among predators. *The American Naturalist* **190**, 663-679  
508 (2017).
- 509 15. M. L. Allen, L. M. Elbroch, C. C. Wilmers, H. U. Wittmer, The comparative effects of large  
510 carnivores on the acquisition of carrion by scavengers. *The American Naturalist* **185**,  
511 822-833 (2015).
- 512 16. L. M. Elbroch, P. E. Lendrum, M. L. Allen, H. U. Wittmer, Nowhere to hide: pumas, black  
513 bears, and competition refuges. *Behavioral Ecology* **26**, 247-254 (2015).
- 514 17. L. M. Elbroch, A. Kusler, Are pumas subordinate carnivores, and does it matter? *PeerJ* **6**,  
515 e4293 (2018).
- 516 18. S. K. Wasser *et al.*, Scat detection dogs in wildlife research and management: application  
517 to grizzly and black bears in the Yellowhead Ecosystem, Alberta, Canada. *Canadian*  
518 *Journal of Zoology* **82**, 475-492 (2004).
- 519 19. C. E. Eriksson, J. Ruprecht, T. Levi, More affordable and effective noninvasive single  
520 nucleotide polymorphism genotyping using high-throughput amplicon sequencing.  
521 *Molecular Ecology Resources* **20**, 1505-1516 (2020).
- 522 20. B. K. Johnson *et al.*, Roles of maternal condition and predation in survival of juvenile elk  
523 in Oregon. *Wildlife Monographs* **201**, 3-60 (2019).
- 524 21. D. A. Clark, G. A. Davidson, B. K. Johnson, R. G. Anthony, Cougar kill rates and prey  
525 selection in a multiple-prey system in northeast Oregon. *The Journal of Wildlife*  
526 *Management* **78**, 1161-1176 (2014).

- 527 22. J. Ruprecht *et al.*, Integrating spatial capture-recapture models with variable individual  
528 identifiability. *BioRxiv* (2021).
- 529 23. D. Fortin *et al.*, Wolves influence elk movements: behavior shapes a trophic cascade in  
530 Yellowstone National Park. *Ecology* **86**, 1320-1330 (2005).
- 531 24. T. Avgar, J. R. Potts, M. A. Lewis, M. S. Boyce, Integrated step selection analysis:  
532 bridging the gap between resource selection and animal movement. *Methods in Ecology*  
533 *and Evolution* **7**, 619-630 (2016).
- 534 25. J. D. Forester, H. K. Im, P. J. Rathouz, Accounting for animal movement in estimation of  
535 resource selection functions: sampling and data analysis. *Ecology* **90**, 3554-3565 (2009).
- 536 26. J. Signer, J. Fieberg, T. Avgar, Animal movement tools (amt): R package for managing  
537 tracking data and conducting habitat selection analyses. *Ecology and Evolution* **9**, 880-  
538 890 (2019).
- 539 27. G. Latombe, D. Fortin, L. Parrott, Spatio-temporal dynamics in the response of woodland  
540 caribou and moose to the passage of grey wolf. *Journal of Animal Ecology* **83**, 185-198  
541 (2014).
- 542 28. A. D. Middleton *et al.*, Linking anti-predator behaviour to prey demography reveals limited  
543 risk effects of an actively hunting large carnivore. *Ecology Letters* **16**, 1023-1030 (2013).
- 544 29. F. Broekhuis, E. K. Madsen, K. Keiwua, D. W. Macdonald, Using GPS collars to  
545 investigate the frequency and behavioural outcomes of intraspecific interactions among  
546 carnivores: A case study of male cheetahs in the Maasai Mara, Kenya. *PloS one* **14**,  
547 e0213910 (2019).
- 548 30. B. T. McClintock, T. Michelot, momentuHMM: R package for generalized hidden Markov  
549 models of animal movement. *Methods in Ecology and Evolution* **9**, 1518-1530 (2018).
- 550 31. D. A. Danner, N. S. Smith, Coyote home range, movement, and relative abundance near  
551 a cattle feedyard. *The Journal of Wildlife Management* **44**, 484-487 (1980).
- 552 32. J. F. Kamler, W. B. Ballard, R. L. Gilliland, K. Mote, Coyote (*Canis latrans*) movements  
553 relative to cattle (*Bos taurus*) carcass areas. *Western North American Naturalist*, 53-58  
554 (2004).
- 555 33. S. Lai, J. Bêty, D. Berteaux, Spatio-temporal hotspots of satellite-tracked arctic foxes  
556 reveal a large detection range in a mammalian predator. *Movement ecology* **3**, 37 (2015).
- 557 34. R. R. Togunov, A. E. Derocher, N. J. Lunn, Windscapes and olfactory foraging in a large  
558 carnivore. *Scientific Reports* **7**, 46332 (2017).
- 559 35. K. P. Burnham, D. R. Anderson, A practical information-theoretic approach. *Model*  
560 *selection and multimodel inference, 2nd ed. Springer, New York* **2** (2002).
- 561 36. E. G. Ritchie, C. N. Johnson, Predator interactions, mesopredator release and  
562 biodiversity conservation. *Ecology Letters* **12**, 982-998 (2009).
- 563 37. K. J. Klauder, B. L. Borg, K. J. Sivy, L. R. Prugh, Gifts of an enemy: scavenging dynamics  
564 in the presence of wolves (*Canis lupus*). *Journal of Mammalogy* (2021).
- 565 38. G. M. Koehler, M. G. Hornocker, Seasonal resource use among mountain lions, bobcats,  
566 and coyotes. *Journal of Mammalogy* **72**, 391-396 (1991).
- 567 39. K. M. Murphy, G. S. Felzien, M. G. Hornocker, T. K. Ruth, Encounter competition  
568 between bears and cougars: some ecological implications. *Ursus*, 55-60 (1998).
- 569 40. R. L. Crabtree, J. W. Sheldon, The ecological role of coyotes on Yellowstone's northern  
570 range. *Yellowstone Science* **7**, 15-23 (1999).
- 571 41. T. C. Atwood, E. M. Gese, Coyotes and recolonizing wolves: social rank mediates risk-  
572 conditional behaviour at ungulate carcasses. *Animal Behaviour* **75**, 753-762 (2008).
- 573 42. C. Wikenros, S. Ståhlberg, H. Sand, Feeding under high risk of intraguild predation:  
574 vigilance patterns of two medium-sized generalist predators. *Journal of Mammalogy* **95**,  
575 862-870 (2014).
- 576 43. A. Tallian *et al.*, Competition between apex predators? Brown bears decrease wolf kill  
577 rate on two continents. *Proceedings of the Royal Society B: Biological Sciences* **284**,  
578 20162368 (2017).
- 579 44. M. L. Allen, L. M. Elbroch, H. U. Wittmer, Can't bear the competition: Energetic losses  
580 from kleptoparasitism by a dominant scavenger may alter foraging behaviors of an apex  
581 predator. *Basic and Applied Ecology* **51**, 1-10 (2021).

- 582 45. M. Krofel, I. Kos, K. Jerina, The noble cats and the big bad scavengers: effects of  
583 dominant scavengers on solitary predators. *Behavioral Ecology and Sociobiology* **66**,  
584 1297-1304 (2012).
- 585 46. C. Hass, Competition and coexistence in sympatric bobcats and pumas. *Journal of*  
586 *Zoology* **278**, 174-180 (2009).
- 587 47. T. M. Williams *et al.*, Instantaneous energetics of puma kills reveal advantage of felid  
588 sneak attacks. *Science* **346**, 81-85 (2014).
- 589 48. M. R. Ebinger *et al.*, Detecting grizzly bear use of ungulate carcasses using global  
590 positioning system telemetry and activity data. *Oecologia* **181**, 695-708 (2016).
- 591 49. J. Hunter, S. Durant, T. Caro, Patterns of scavenger arrival at cheetah kills in Serengeti  
592 National Park Tanzania. *African Journal of Ecology* **45**, 275-281 (2007).
- 593 50. S. Périquet, H. Fritz, E. Revilla, The Lion King and the Hyaena Queen: large carnivore  
594 interactions and coexistence. *Biological Reviews* **90**, 1197-1214 (2015).
- 595 51. D. Dekker, M. Out, M. Tabak, R. Ydenberg, The effect of kleptoparasitic bald eagles and  
596 gyrfalcons on the kill rate of peregrine falcons hunting dunlins wintering in British  
597 Columbia. *The Condor* **114**, 290-294 (2012).
- 598 52. M. L. Allen, L. M. Elbroch, C. C. Wilmers, H. U. Wittmer, Trophic facilitation or limitation?  
599 Comparative effects of pumas and black bears on the scavenger community. *PLoS One*  
600 **9** (2014).
- 601 53. C. Calenge, The package “adehabitat” for the R software: a tool for the analysis of space  
602 and habitat use by animals. *Ecological Modelling* **197**, 516-519 (2006).

603

604

605 **Figures and Tables**  
606

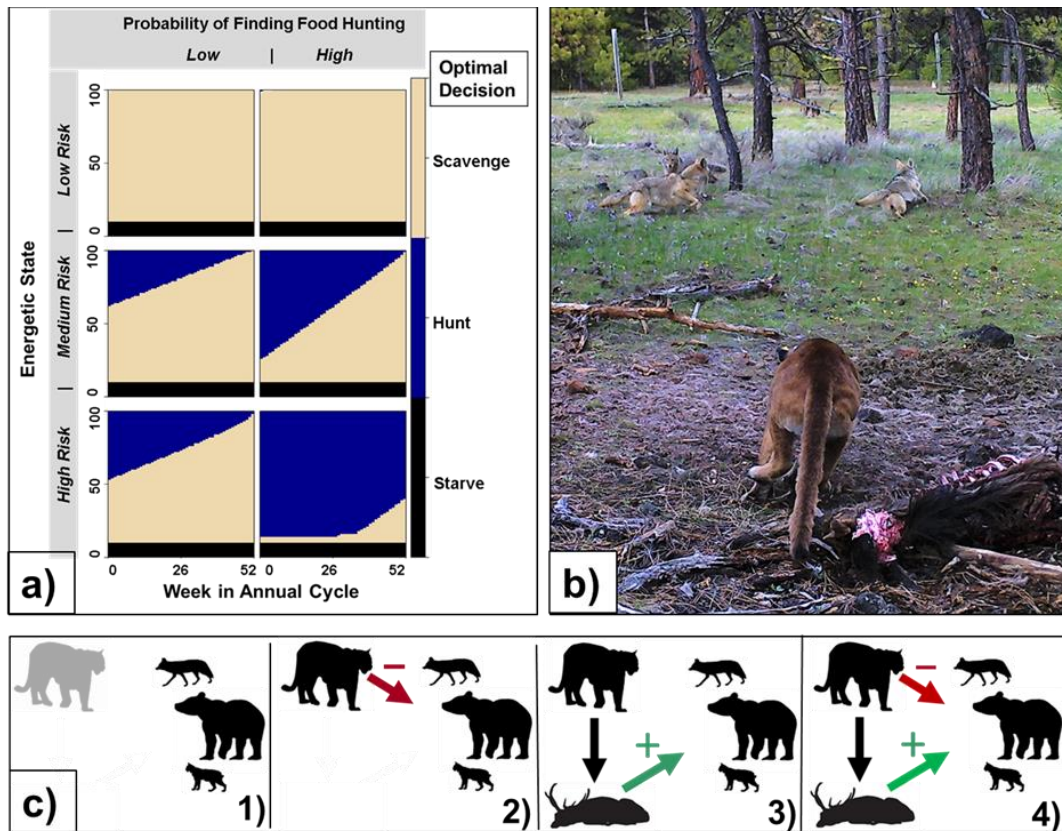

607  
608 **Figure 1.** a) Predictions from a two patch dynamic state variable model used as an illustrative  
609 example. The conceptual model predicts the fitness-maximizing decision where the choices are  
610 to scavenge (patch 1, tan shading) or forego the scavenging opportunity and hunt alternative prey  
611 (patch 2, blue shading). The optimal decision in this theoretical model depends on the risk,  
612 quantified as daily probability of death, and reward, quantified as probability of finding food. The  
613 fitness-maximizing decision depends not only on risk and reward of each patch, but also the  
614 energetic state of the scavenger (y-axis) and the week within an annual cycle (x-axis). b)  
615 Interaction between coyotes and a cougar at a kill site monitored by remote camera. c) Possible  
616 influences of dominant predators in a carnivore community: 1) dominant predators do not  
617 influence other carnivores (null hypothesis), 2) dominant predators negatively influence other  
618 carnivores through interference competition or interspecific killing (suppression hypothesis), 3)  
619 dominant predators positively influence other carnivores due to resource provisioning via  
620 scavenging (facilitation hypothesis), and 4) dominant predators both positively and negatively  
621 influence other carnivores (provision-predation hypothesis if positive and negative interactions are  
622 independent, fatal attraction hypothesis if scavenging leads to increased mortality).  
623  
624

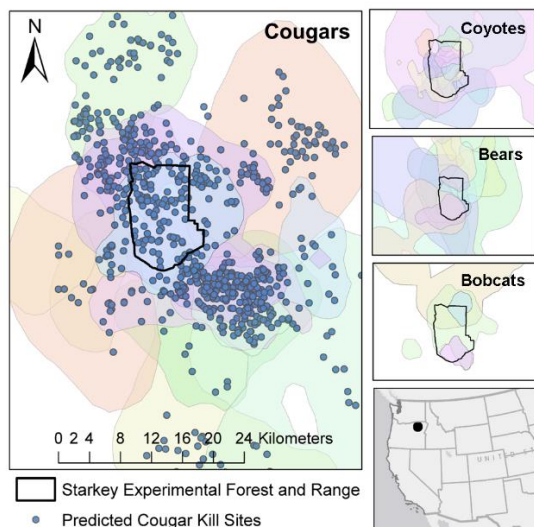

625  
626  
627  
628  
629  
630  
631  
632  
633  
634

**Figure 2.** Study area. Left panel: Known and predicted cougar kill sites (blue points) and 95% kernel density home range estimates (colored polygons) for collared cougars. Right panels, top to bottom: coyote, black bear and bobcat 95% kernel density home range estimates (colored polygons). All panels: Starkey Experimental Forest and Range (black polygon). Kernel density estimates were calculated using the kernelUD function in the adehabitatHR package (53) in program R. We used the default ad hoc smoothing parameter which assumes the kernel is bivariate normal (53).

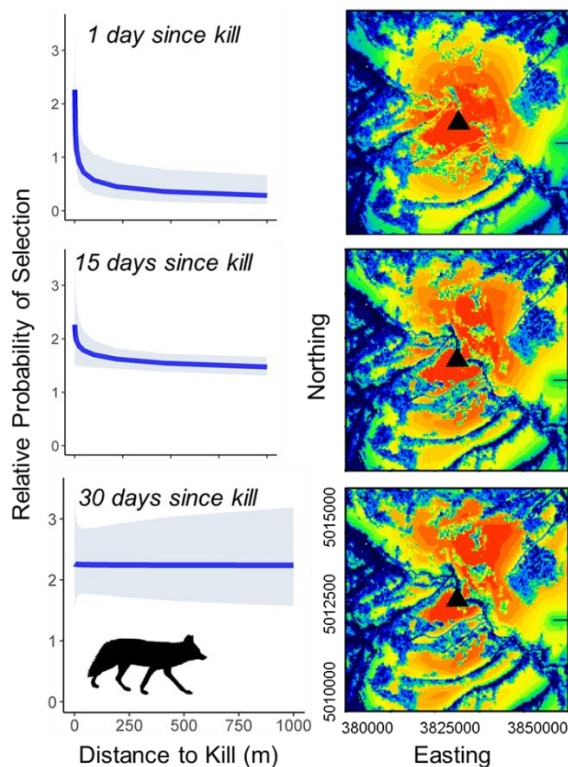

635  
636  
637  
638  
639  
640  
641  
642  
643

**Figure 3.** Attraction of coyotes to cougar kill sites. The first column presents marginal response plots for step selection functions showing the relative probability of selection as a function of the distance to the kill site. The second column presents predictive maps showing the relative probability of selecting for areas on the landscape as a function of the distance to the nearest kill site (black triangle). Warm colors indicate selection and cool colors indicate avoidance. In both columns, each row shows the predicted response at 1, 15, and 30 days after the kill was made.



644

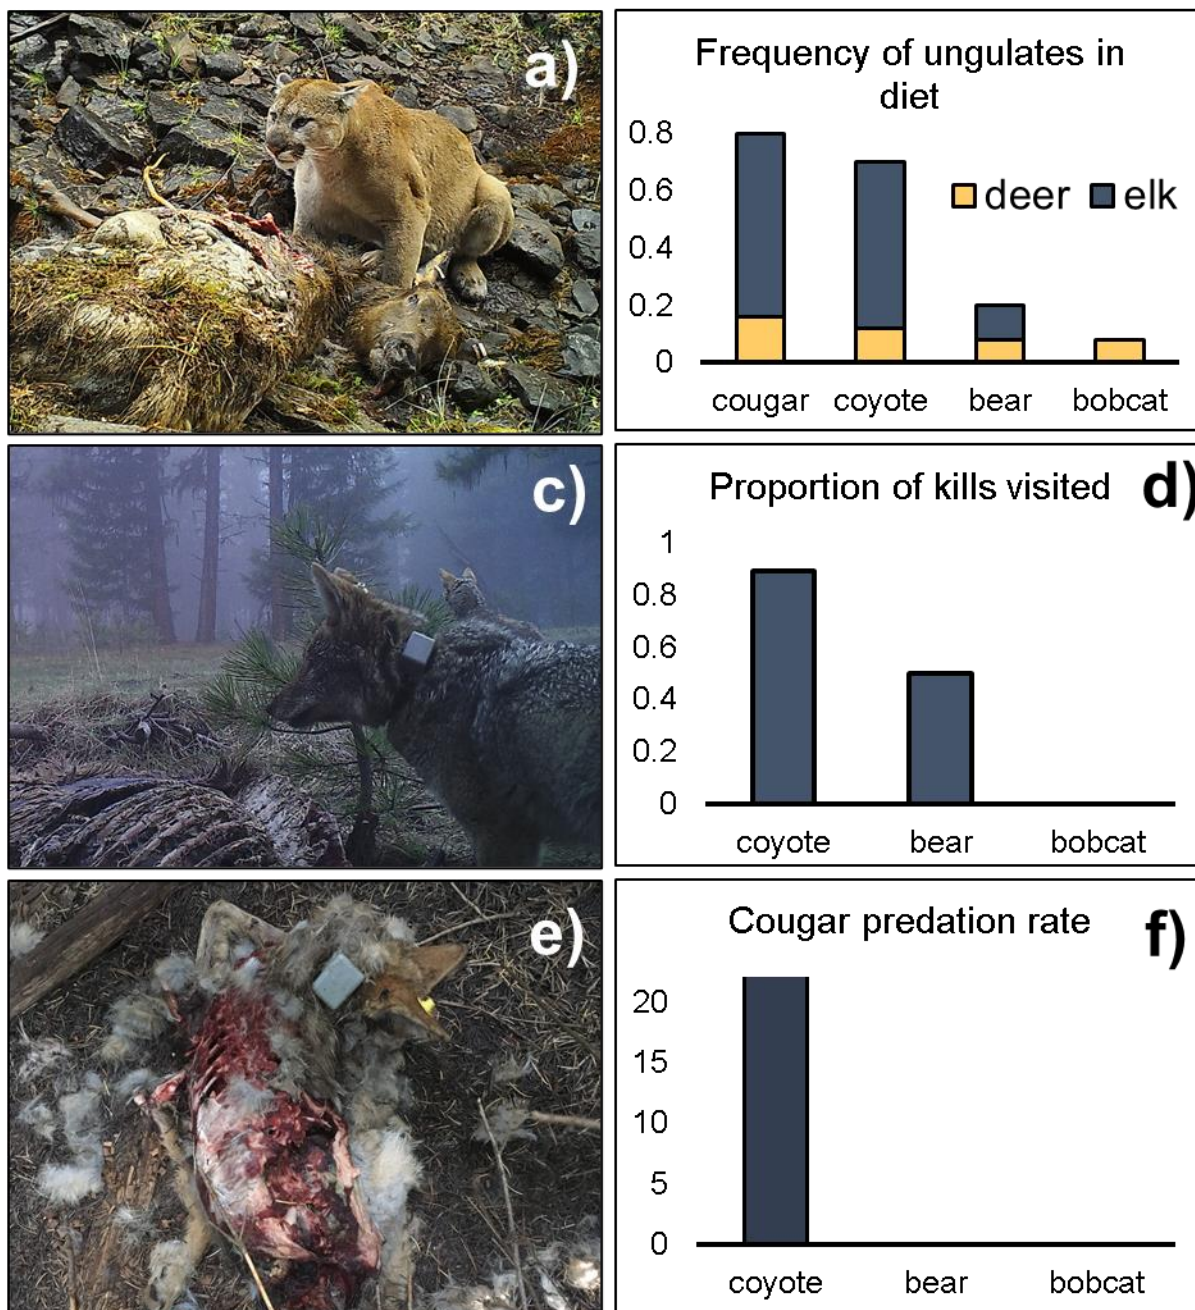

645  
646  
647  
648  
649  
650  
651  
652

**Figure 4.** Left panel: Remote camera photos of a) cougar feeding on an adult female elk, c) coyotes scavenging a cougar kill, e): coyote killed by cougar. Right panel: plots showing b) percentages of deer and elk in carnivore diets determined from DNA-metabarcoding of scats (except for cougars in which diet estimates came from kill site investigations), d) proportions of cougar kill sites visited by other carnivores as documented by remote cameras, and f) the estimated proportion of the population of each species killed annually by cougars.

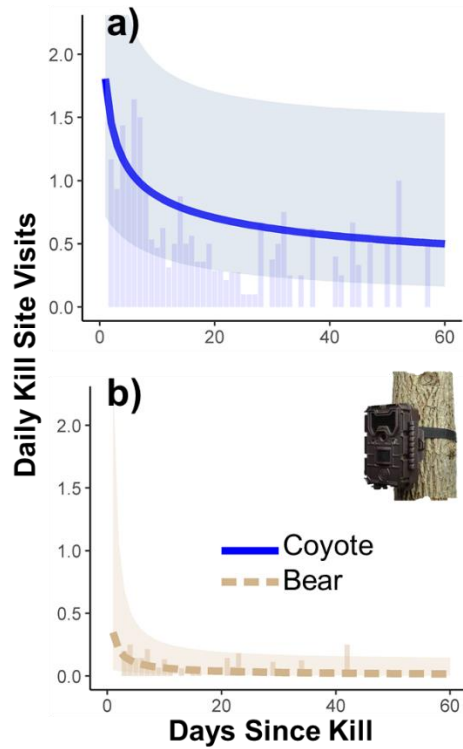

653  
654  
655  
656  
657  
658  
659  
660  
661

**Figure 5.** Remote-camera based estimates of daily visits to cougar kill sites by coyotes (panel a) and black bears (panel b). The thick line displays the predicted number of visits for coyotes (solid blue line) and bears (dotted tan line). Shaded regions indicate 95% confidence interval for the predictions. The vertical bars display the mean number of visits for every day since the kill was made, across all kill sites monitored (N = 28). The predictions assume that the kill was a large ungulate (i.e., the binary factor variable for prey size = 1) and that a cougar was present (i.e., the binary factor variable for cougar present = 1).

|                                                                                   | GPS collars                                                                                                 | Scats                                                                                                          | Cameras                                                                                          | Clusters                                                                                                         |                                                                                                                    |
|-----------------------------------------------------------------------------------|-------------------------------------------------------------------------------------------------------------|----------------------------------------------------------------------------------------------------------------|--------------------------------------------------------------------------------------------------|------------------------------------------------------------------------------------------------------------------|--------------------------------------------------------------------------------------------------------------------|
|                                                                                   | <i>Cougar presence</i><br> | <i>Kill site presence</i><br> | <i>Diet</i><br> | <i>Carcass Visitations</i><br> | <i>Intraguild predation</i><br> |
|  | Suppression                                                                                                 | Facilitation                                                                                                   | Facilitation                                                                                     | Facilitation                                                                                                     | Suppression                                                                                                        |
|  | Suppression                                                                                                 | Null                                                                                                           | Facilitation                                                                                     | Facilitation                                                                                                     | Null                                                                                                               |
|  | Null                                                                                                        | Null                                                                                                           | Null                                                                                             | Null                                                                                                             | Null                                                                                                               |

662  
663  
664  
665  
666

**Figure 6.** Weight of evidence for support of suppression, facilitation, and null hypotheses regarding the influence of a dominant predator, cougars, on subordinate or co-occurring carnivores: coyotes, bears, and bobcats.

667 **Table 1.** Parameter estimates for landscape and cougar variables influencing the relative  
 668 probability of selection in step-selection functions in coyotes, black bears, and bobcats. PVT =  
 669 potential vegetation type, CP = cougar present, D2C = distance to nearest cougar, KP = kill  
 670 present, D2K = distance to nearest kill, and TSK = time since kill.  
 671

|                                          | Coyote  |       |       | Bear    |      |       | Bobcat  |      |       |
|------------------------------------------|---------|-------|-------|---------|------|-------|---------|------|-------|
|                                          | $\beta$ | SE    | P     | $\beta$ | SE   | P     | $\beta$ | SE   | P     |
| CP × D2C <sup>1</sup>                    | 0.20    | 0.08  | 0.01  | 0.55    | 0.15 | <0.01 | 0.26    | 0.26 | 0.33  |
| KP × D2K <sup>1</sup>                    | -0.26   | 0.05  | <0.01 | 0.01    | 0.10 | 0.93  | 0.11    | 0.17 | 0.54  |
| KP × D2K <sup>1</sup> × TSK <sup>1</sup> | 0.07    | 0.02  | <0.01 | -0.02   | 0.04 | 0.59  | -0.08   | 0.07 | 0.26  |
| Canopy Cover                             | -0.13   | 0.01  | <0.01 | 0.36    | 0.01 | <0.01 | 0.32    | 0.01 | <0.01 |
| Distance to Road <sup>1</sup>            | 0.09    | 0.01  | <0.01 | 0.13    | 0.01 | <0.01 | 0.10    | 0.02 | <0.01 |
| Distance to Water <sup>1</sup>           | 0.02    | 0.01  | 0.01  | -0.01   | 0.01 | 0.44  | 0.01    | 0.02 | 0.45  |
| Ruggedness                               | -0.06   | 0.01  | <0.01 | 0.16    | 0.01 | <0.01 | 0.02    | 0.02 | 0.23  |
| PVT, Wet Forest <sup>2</sup>             | -0.09   | 0.02  | <0.01 | 0.42    | 0.03 | <0.01 | 0.98    | 0.07 | <0.01 |
| PVT, Dry Forest <sup>2</sup>             | -0.08   | 0.02  | <0.01 | 0.26    | 0.03 | <0.01 | 0.71    | 0.07 | <0.01 |
| PVT, Other <sup>2</sup>                  | -0.25   | 0.15  | 0.09  | 1.39    | 0.11 | <0.01 | 1.26    | 0.31 | <0.01 |
| Step Length <sup>1</sup>                 | 0.03    | <0.01 | <0.01 | 0.04    | 0.01 | <0.01 | 0.05    | 0.01 | <0.01 |
| Turning Angle <sup>3</sup>               | -0.09   | 0.01  | <0.01 | 0.04    | 0.00 | <0.01 | 0.22    | 0.02 | <0.01 |

672 <sup>1</sup>Indicates the variable was natural log transformed; <sup>2</sup>the reference category was Grassland;  
 673 <sup>3</sup>indicates the cosine of the variable was used.
